# Supplementary material for: In situ tumor vaccine with optimized nanoadjuvants and lymph node targeting capacity to treat ovarian cancer and metastases
Source: PubMed Central journal article supplement — Acta Pharm Sin B. 2024 Jun 8;14(9):4102–17. doi: 10.1016/j.apsb.2024.06.003 (PMC11413692; doi:10.1016/j.apsb.2024.06.003), 2024-06-08
Supplement: mmc1.pdf [file mmc1.pdf]

**Supporting Information for**

**ORIGINAL ARTICLE**

***In situ* tumor vaccine with optimized nanoadjuvants and lymph node targeting capacity to treat ovarian cancer and metastases**

**Yuan Li<sup>a,†</sup>, Fan Tong<sup>b,†</sup>, Yufan Wang<sup>b</sup>, Jing Wang<sup>b</sup>, Manqi Wu<sup>a</sup>, Hanmei Li<sup>c</sup>, Hongyan Guo<sup>a,\*</sup>, Huile Gao<sup>b,\*</sup>**

<sup>a</sup>*Department of Obstet Gynecol, Peking University Third Hospital, Beijing 100191, China*

<sup>b</sup>*Key Laboratory of Drug Targeting and Drug Delivery Systems, West China School of Pharmacy, Sichuan University, Chengdu 610041, China*

<sup>c</sup>*School of Food and Biological Engineering, Chengdu University, Chengdu 610106, China*

Received 22 January 2024; received in revised form 17 April 2024; accepted 20 April 2024

\*Corresponding authors.

E-mail addresses: bysyghy@163.com (Hongyuan Guo), gaohuile@scu.edu.cn (Huile Gao).

†These authors made equal contributions to this work.

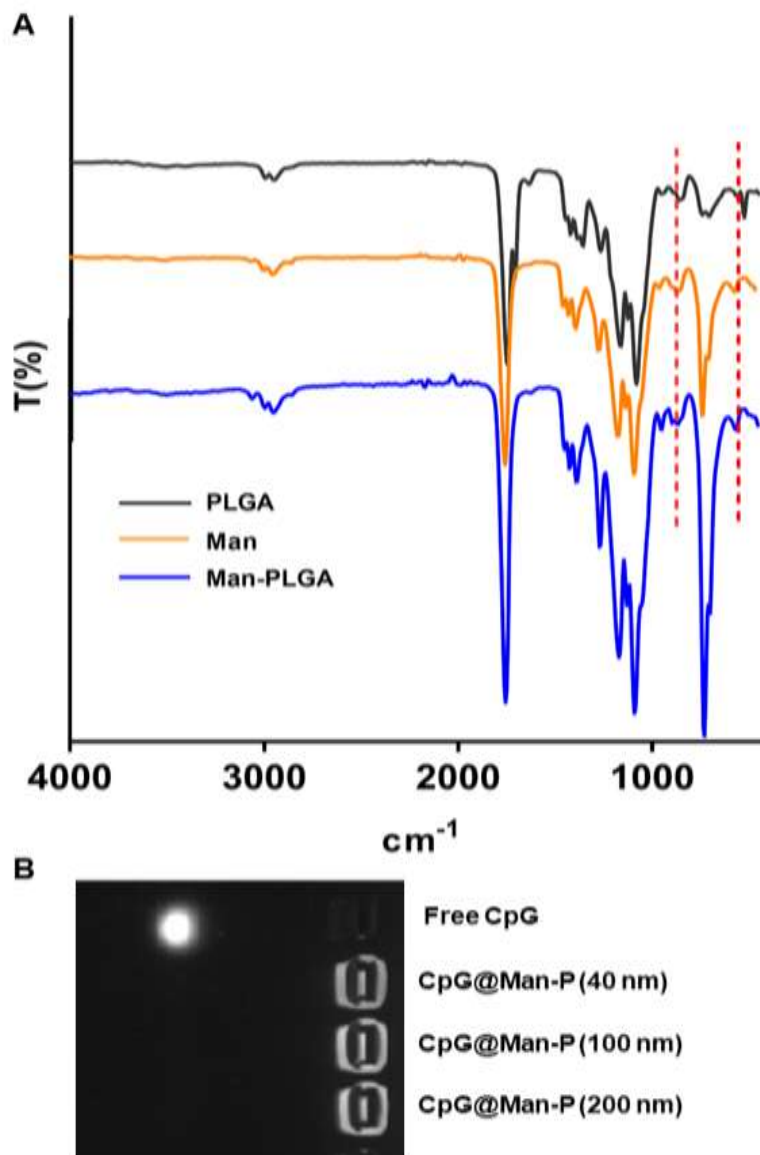

**Figure S1** (A) FT-IR spectrum of PLGA, Man, and Man-PLGA. (B) Characterization of CpG@Man-P loaded with CpG by agarose gel electrophoresis (40, 100, 200 nm).

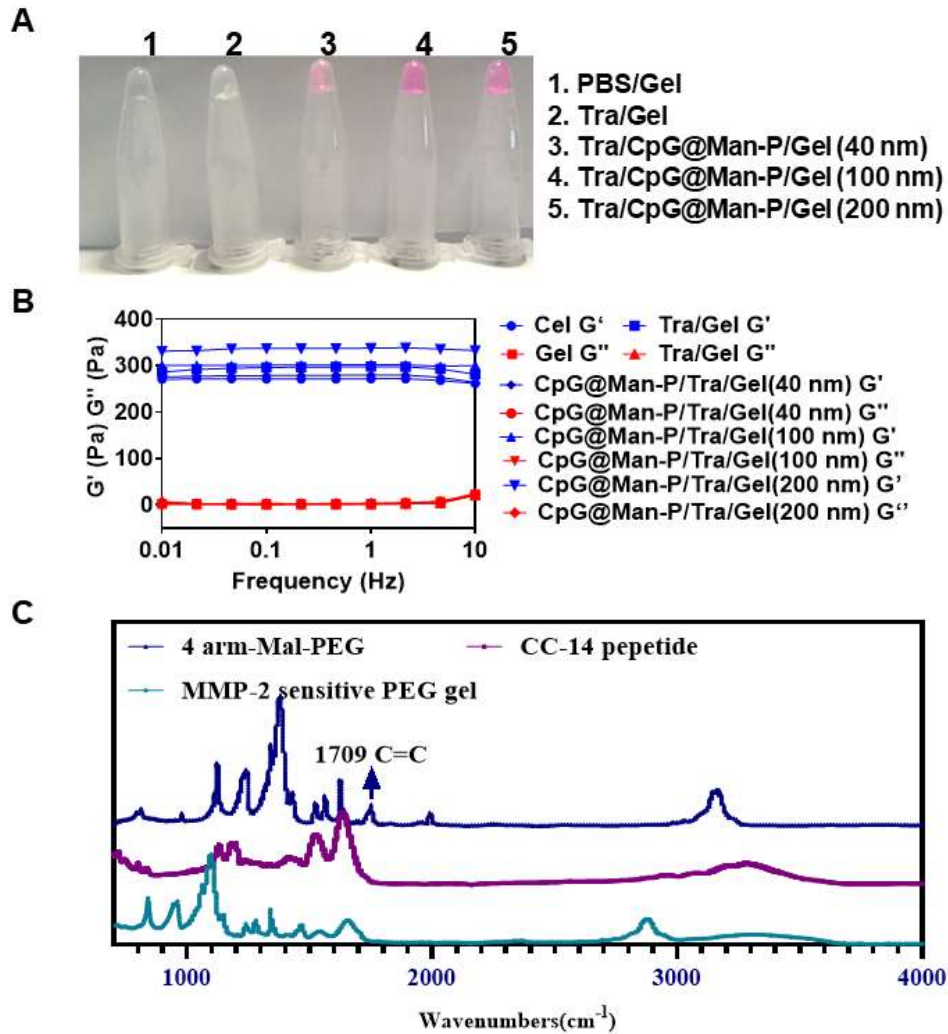

**Figure S2** (A) Inversion method to characterize hydrogels. (B) Rheological properties of hydrogels. (C) FT-IR characterization of hydrogels.

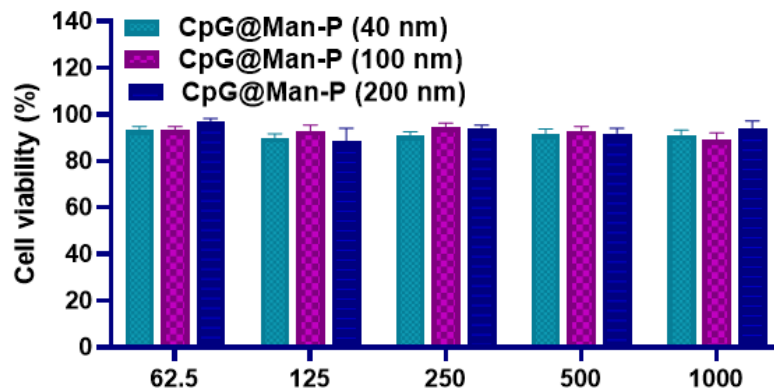

**Figure S3** MTT assay of CPG@Man-P (40 nm, 100 nm, 200 nm) on DC2.4. cells. Error bars represent mean  $\pm$  SD ( $n = 4$ ).

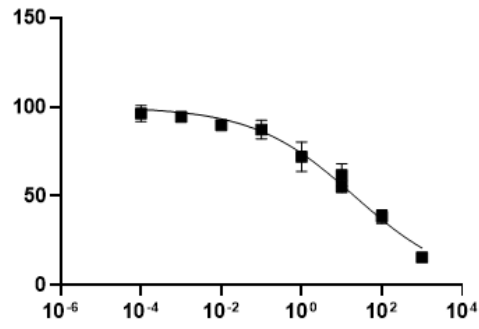

**Figure S4** MTT assay of Tra on ID8 cells.

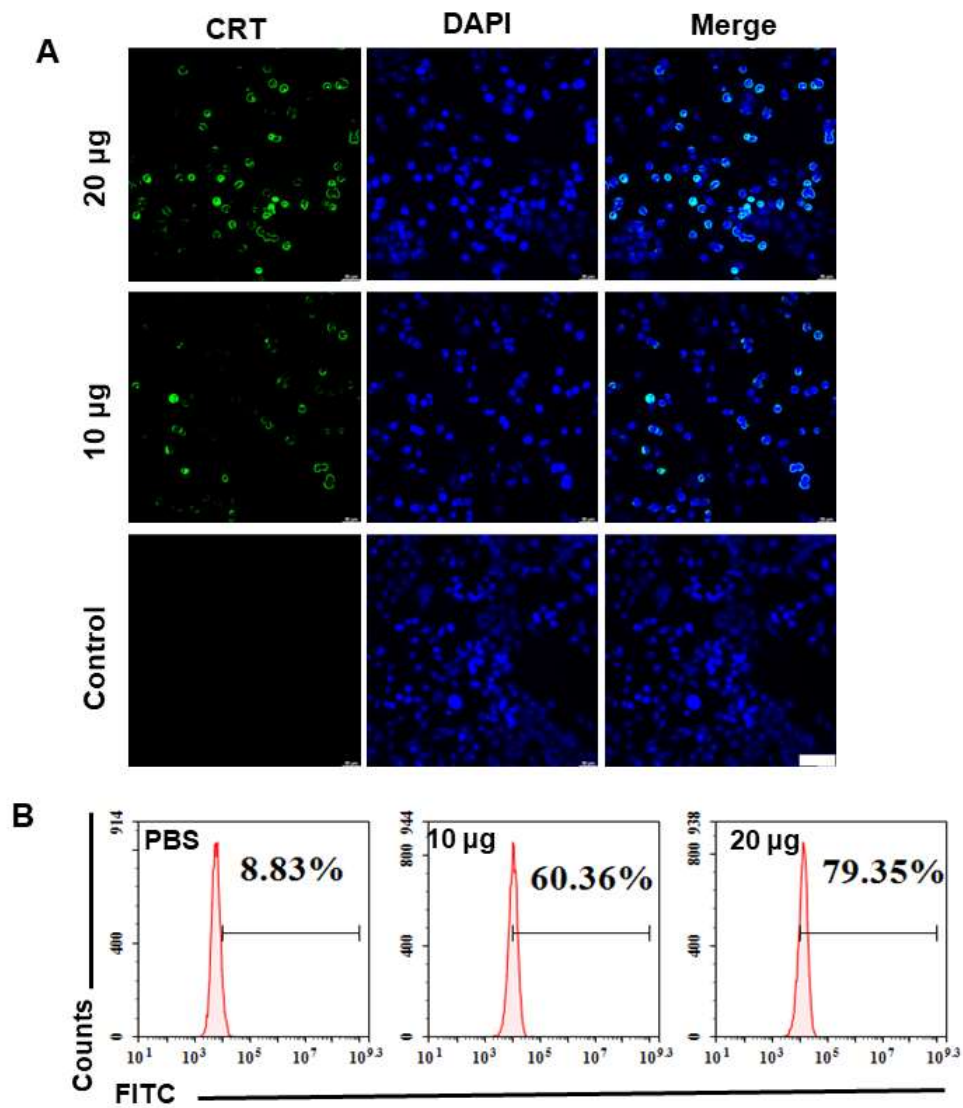

**Figure S5** (A, B) Confocal (A) and flow cytometry (B) characterization of CRT exposure on the surface of ID8 cells. The scale bars represent 50 µm.

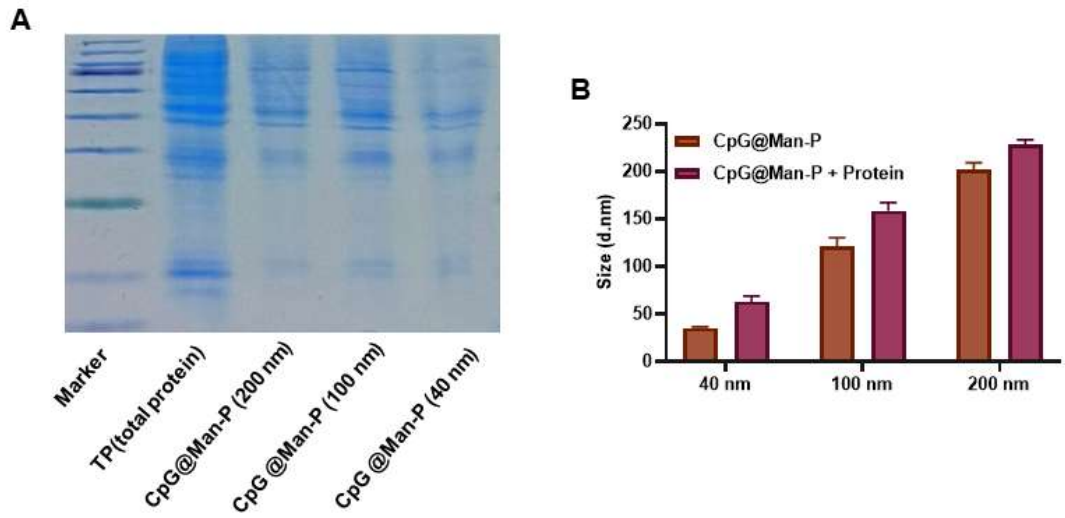

**Figure S6** (A) SDS-PAGE characterization of antigen adsorption on CPG@Man-P (40 nm, 100 nm, 200 nm). (B) Size change of CPG@Man-P (40 nm, 100 nm, 200 nm) after antigen adsorption. Error bars represent mean  $\pm$  SD ( $n = 3$ ).

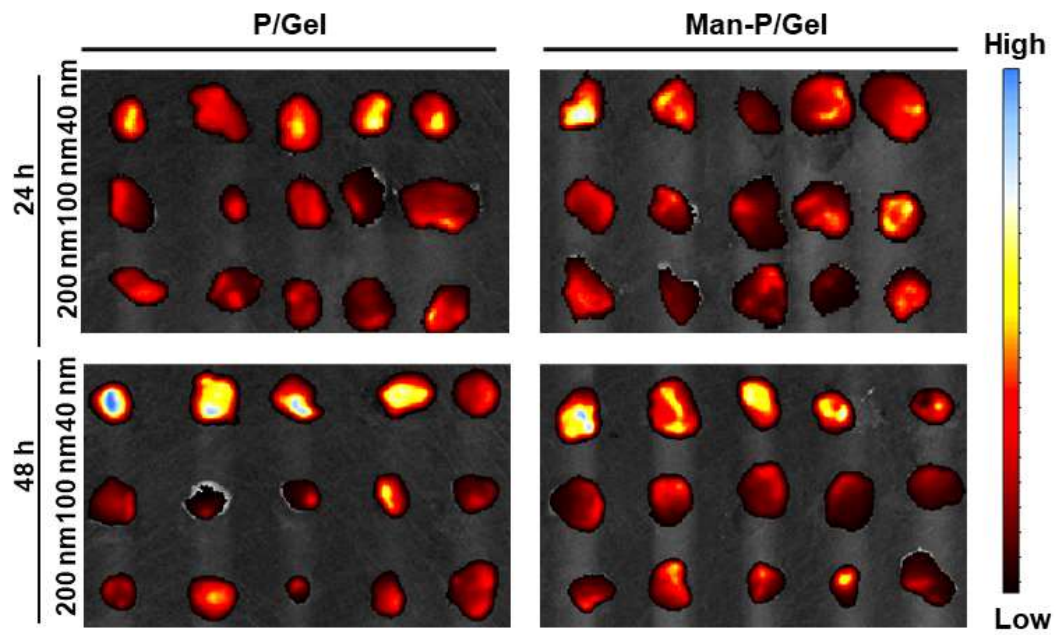

**Figure S7** DiR@Man-P (40 nm, 100 nm, 200 nm) accumulation at the tumor site.

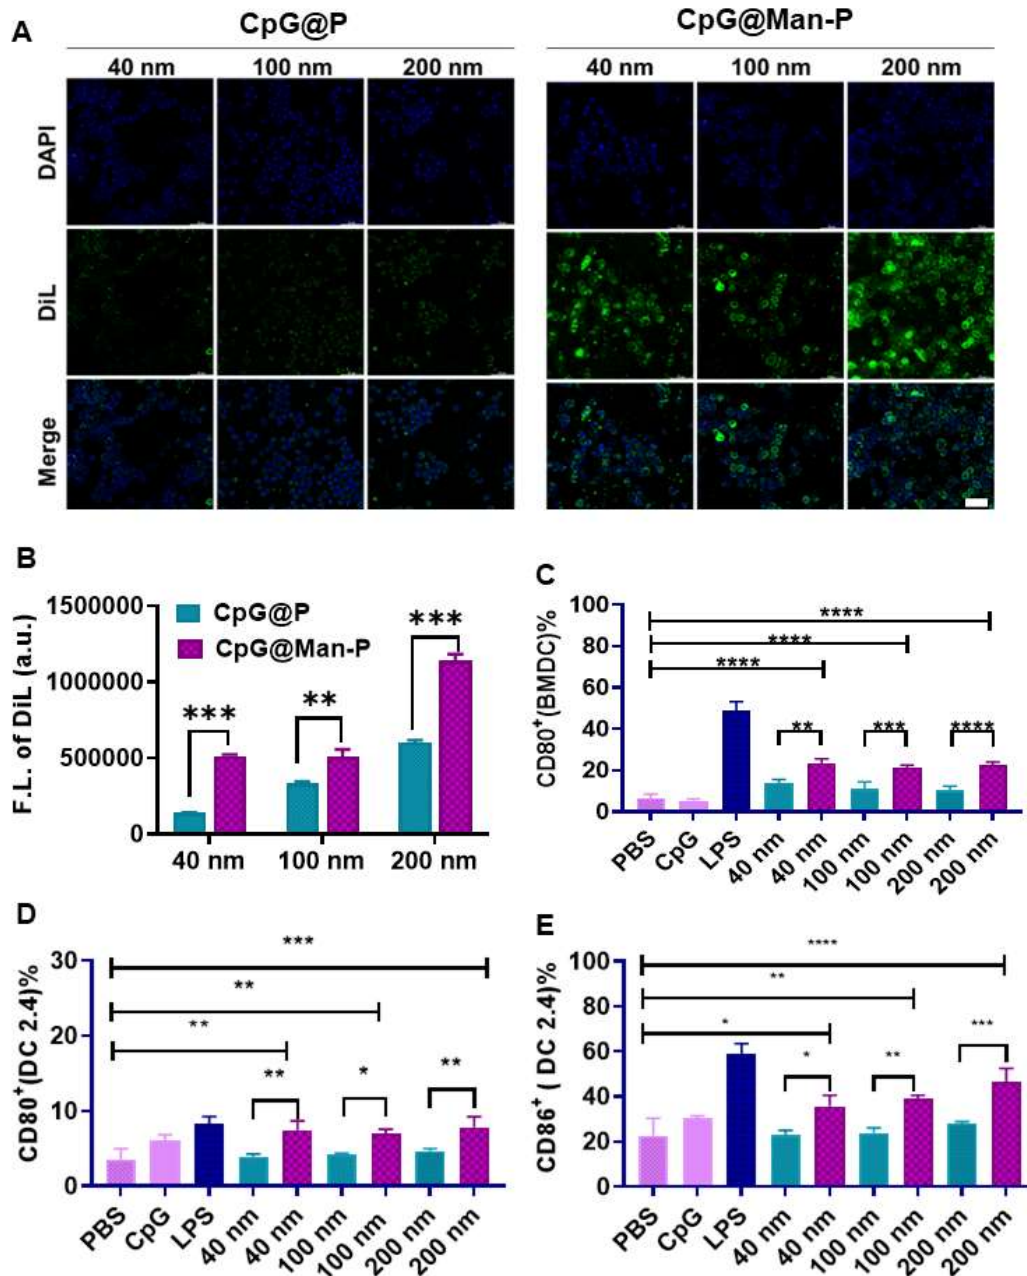

**Figure S8** (A) Cellular uptake of Dil@P and Dil@Man-P by DC2.4 cells, which was observed by confocal microscope. The scale bar represents 50  $\mu$ m. (B) Cellular uptake of Dil@P and Dil@Man-P by DC2.4 cells. (C) Percentages of CD80<sup>+</sup> BMDC cells gated by CD11c<sup>+</sup>. Percentages of CD80<sup>+</sup> (D) and CD86<sup>+</sup> (E) DC2.4 cells gated by CD11c<sup>+</sup>. Error bars represent mean  $\pm$  SD ( $n = 3$ ). Statistical significance was set at \* $P < 0.05$ , \*\*  $P < 0.01$ , \*\*\*  $P < 0.001$ , \*\*\*\*  $P < 0.0001$ , and ns, not significant.



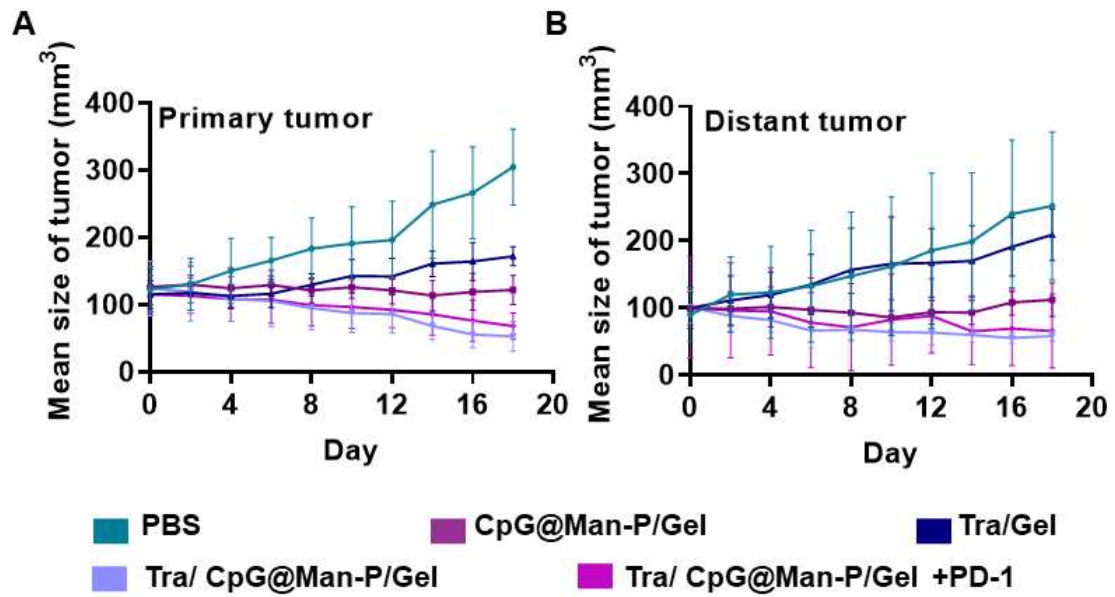

**Figure S9** Primary (A) and Distant (B) tumor volume growth curves. Error bars represent mean  $\pm$  SD ( $n = 5$ ).

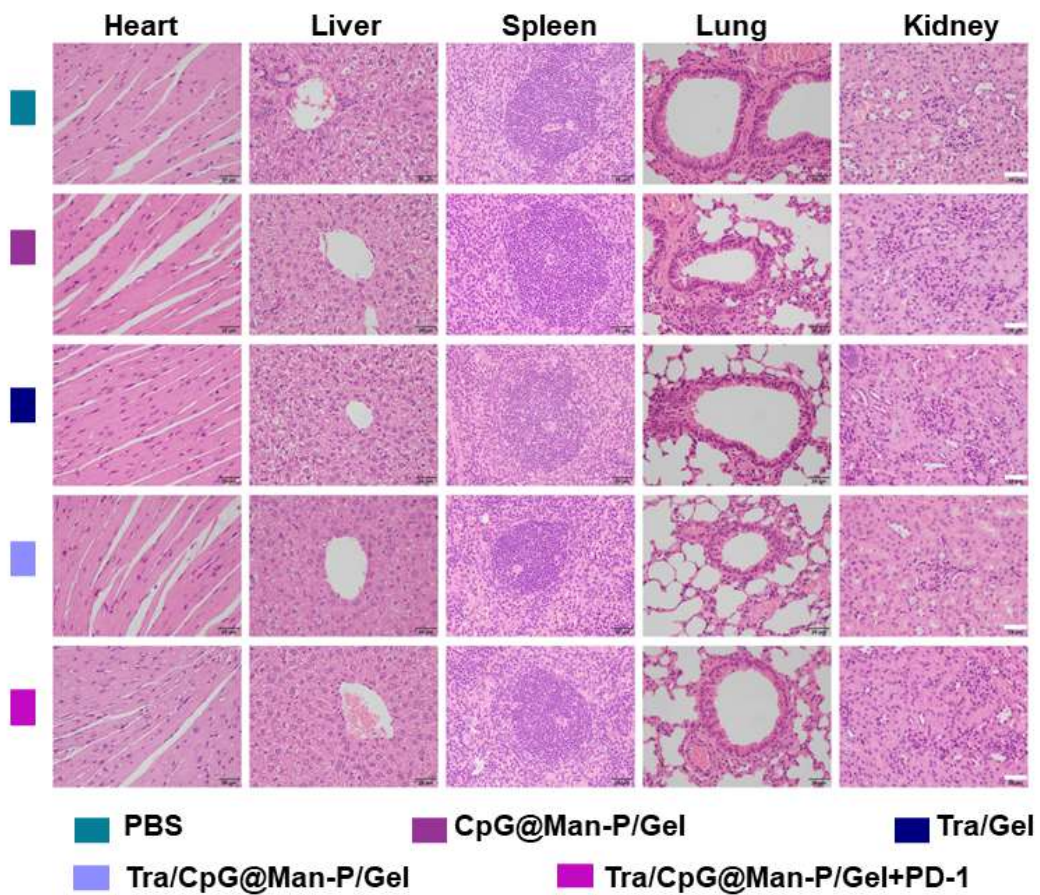

**Figure S10** HE imaging of major organs. The scale bars represent 20  $\mu$ m.

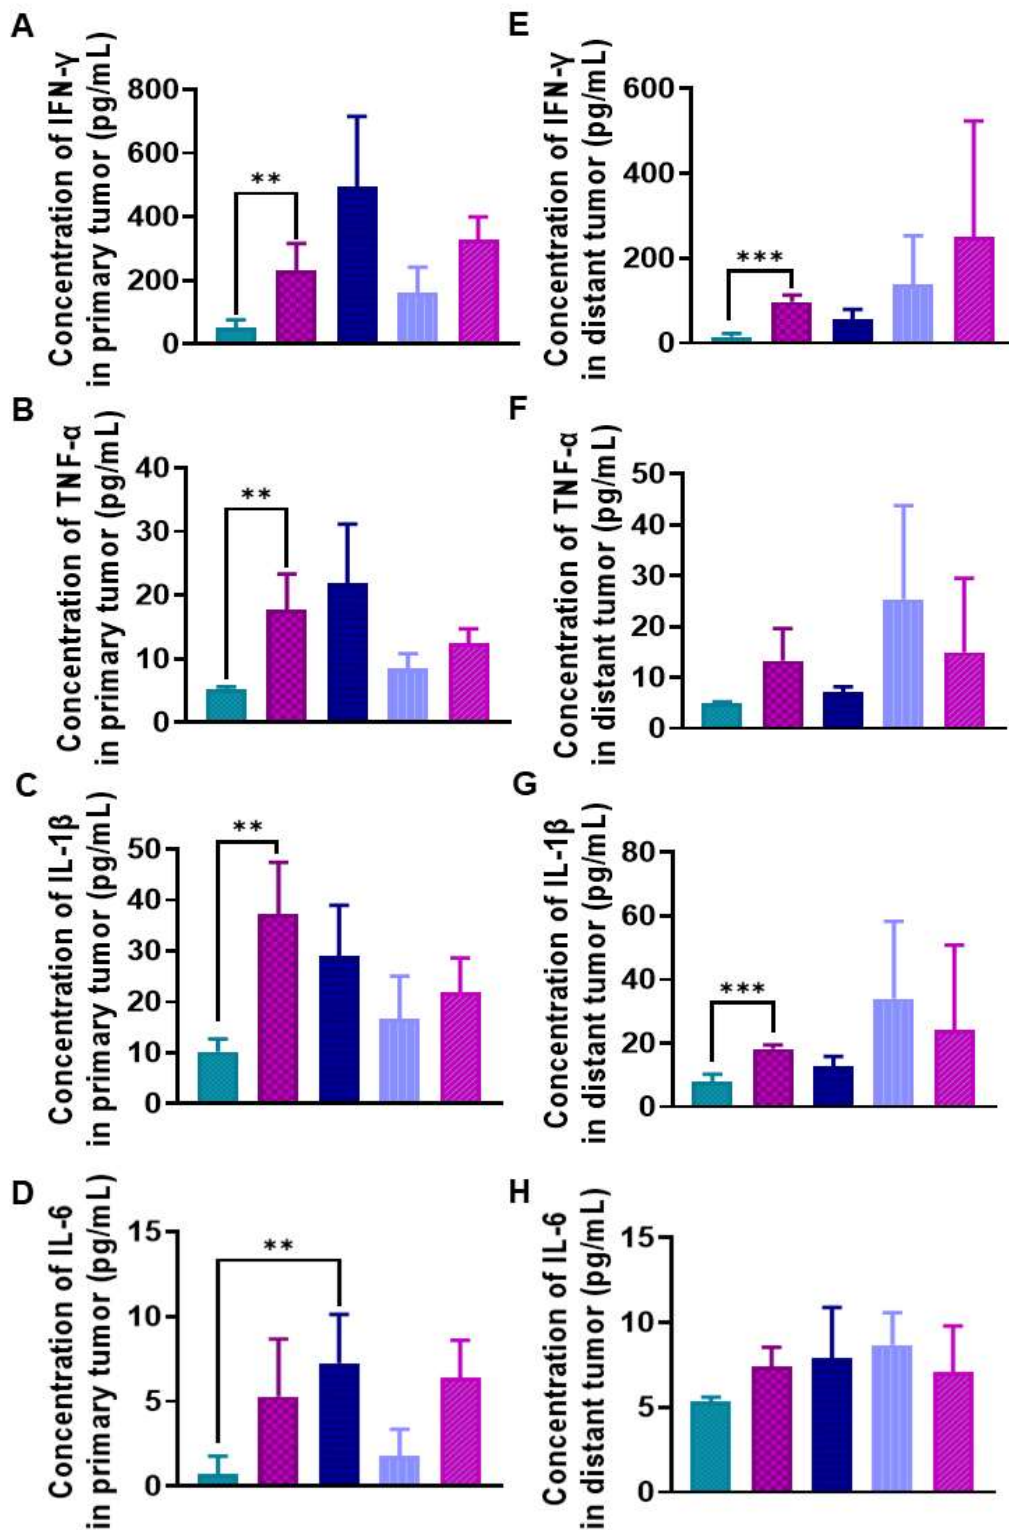

**Figure S11** (A-D) Elisa analyses of IFN- $\gamma$  (A), TNF- $\alpha$  (B), IL-1 $\beta$  (C), and IL-6 (D) levels in the primary tumors. (E-H) Elisa analyses of IFN- $\gamma$  (E), TNF- $\alpha$  (F), IL-1 $\beta$  (G), and IL-6 (H) levels in the distant tumors. Error bars represent mean  $\pm$  SD ( $n = 3, 4$ ).



Statistical significance was set at  $*P < 0.05$ ,  $** P < 0.01$ ,  $*** P < 0.001$ ,  $**** P < 0.0001$ , and ns, not significant.

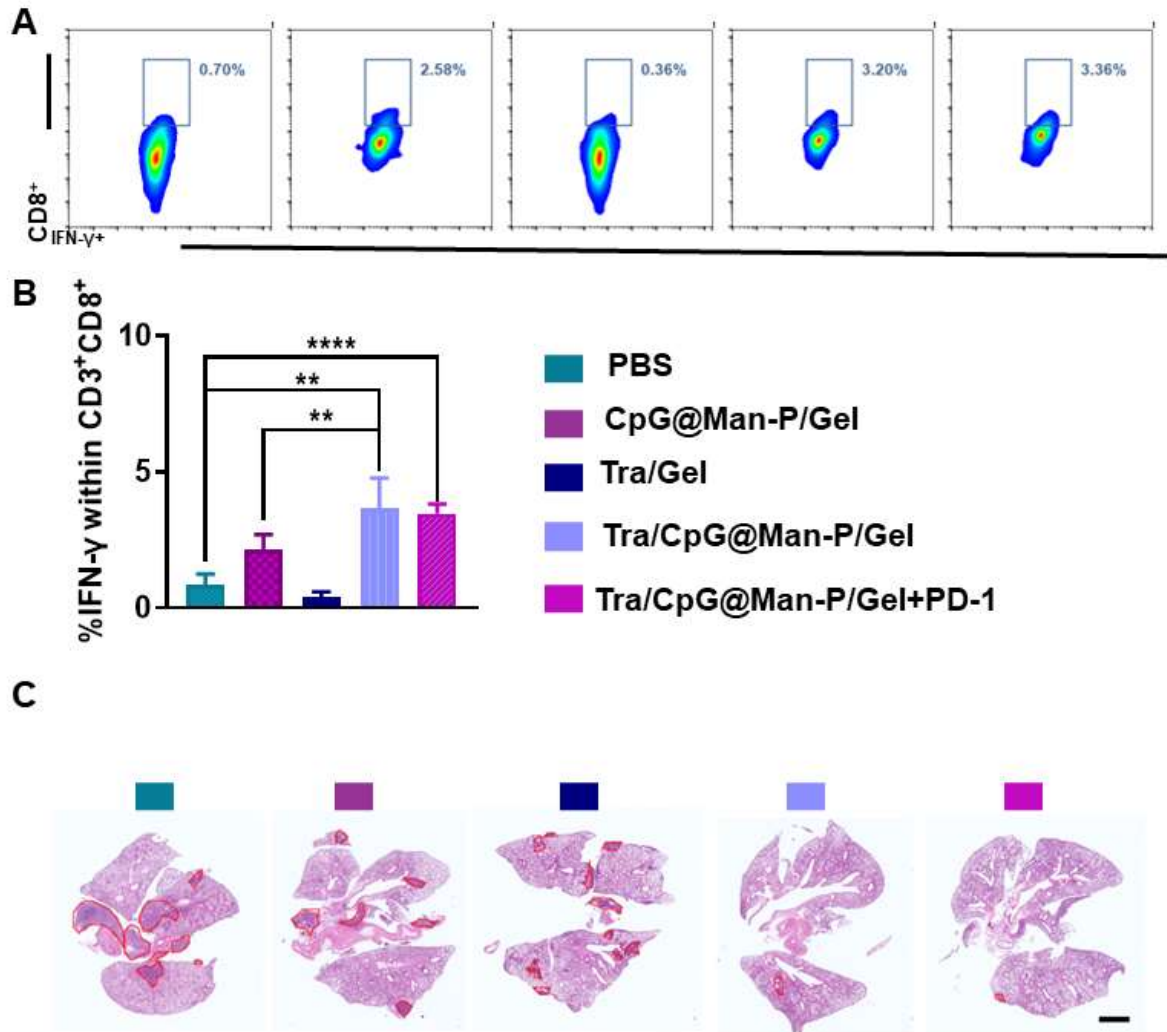

**Figure S12** (A, B) The percentage of IFN- $\gamma^+$  CD8 $^+$  T cells in the primary tumors detected by flow cytometry. (C) HE staining of lung tissues to investigate the anti-metastasis effect. The circled portions were metastatic tumor cells. The scale bar represents 2 mm. Error bars represent mean  $\pm$  SD ( $n = 3, 4$ ). Statistical significance was set at  $*P < 0.05$ ,  $** P < 0.01$ ,  $*** P < 0.001$ ,  $**** P < 0.0001$ , and ns, not significant.

**Table S1.** Drug loading ratio and entrapment ratio of CpG@Man-P

| Nanocarrier        | Entrapment ratio (%) | Drug loading ratio (%) |
|--------------------|----------------------|------------------------|
| CpG@Man-P (40 nm)  | 77.2 ± 10.3          | 0.077 ± 0.010          |
| CpG@Man-P (100 nm) | 79.2 ± 13.2          | 0.079 ± 0.014          |
| CpG@Man-P (200 nm) | 77.9 ± 14.3          | 0.079 ± 0.014          |

Error bars represent mean ± SD ( $n = 3$ ).
